# Supplementary material for: Toxic dinoflagellate Prorocentrum cordatum affects the filtration rate and enzymatic activities of Chinese razor clam (Sinonovacula constricta)
Source: PeerJ journal article supplement (doi:10.7717/peerj.20072), 2025-09-18
Supplement: raw_data.zip [file Chlorophyll a concentration.xlsx]

## Sheet: Sheet1
		Chlorophyll a concentration µg/L
Control group		0h	1h	2h	3h	4h	5h	6h	8h	10h	12h
Treatment 1	No. 1	68.4459	38.4678	32.1202	20.7322	14.8689	11.1847	9.37049	7.48525	7.2459	6.25902
	No. 2	67.6623	30.5421	15.623	10.2503	7.56612	7.69617	7.50383	6.75847	6.26448	6.18689
	No. 3	67.8131	33.1169	24.2186	20.8044	12.8022	9.28087	8.05574	7.56175	6.45792	6.70273
	No. 4	50.9792	29.6525	17.4372	15.2732	9.17814	8.78033	8.06557	9.16393	9.00328	7.8623
	No. 5	61.4754	32.3716	19.7443	14.9082	11.2426	9.07322	8.16721	7.53552	7.01421	6.86776
	No. 6	44.0426	26.3617	16.7596	12.9432	8.61421	6.92896	7.02077	6.31475	8.94098	6.83169
	No. 7(no clam)	61.577	44.147	36.27	30.008	24.097	20.425	16.936	12.625	9.984	9.818
	No. 8(no clam)	60.873	47.135	35.961	27.139	22.584	17.136	15.413	11.228	8.324	7.533
Treatment 2	No. 1	133.344	20.5242	62.0581	46.9805	46.8774	36.0999	29.3044	16.7048	11.9041	12.4258
	No. 2	142.767	74.156	44.9596	35.2267	24.8863	16.6563	13.027	8.7691	6.84139	7.57173
	No. 3	133.597	56.3855	34.0864	23.2629	10.7751	14.4529	13.5275	8.11452	6.47994	6.6588
	No. 4	111.925	37.9791	19.9491	11.5017	9.00261	7.53198	7.76922	8.02757	7.6388	8.22879
	No. 5	117.756	70.3304	45.1832	34.741	20.8123	14.1163	11.0347	14.0976	9.7876	8.80512
	No. 6	121.51	76.1967	48.5654	37.2289	26.3619	22.6208	16.6128	12.1724	10.4285	9.61495
	No. 7(no clam)	114.174	86.742	75.412	66.629	51.294	40.182	34.104	27.524	16.765	16.946
	No. 8(no clam)	111.102	93.061	70.067	55.399	44.16	34.684	27.748	18.929	13.893	11.088
Treatment 3	No. 1	180.432	94.3961	71.8925	59.4339	43.8936	33.7641	25.4493	22.1799	15.5403	15.0784
	No. 2	172.211	90.1382	71.6105	49.6884	36.9962	25.7685	19.9671	11.1465	7.74328	11.2507
	No. 3	170.234	80.4454	49.2397	36.6659	27.6807	23.5864	17.9078	11.4405	7.80801	10.7482
	No. 4	176.619	135.349	106.037	85.9528	70.8382	58.8261	49.1157	33.7301	21.4262	16.6725
	No. 5	179.832	117.518	88.0592	61.0795	48.7778	39.1278	32.3511	21.3396	14.0834	11.6829
	No. 6	150.134	73.1684	40.8722	24.2633	19.706	14.4092	13.503	15.8837	13.8508	10.8261
	No. 7(no clam)	167.954	118.327	97.906	79.22	64.184	52.418	43.298	29.677	21.718	22.094
	No. 8(no clam)	173.755	128.262	92.067	73.702	57.09	46.785	39.419	26.031	19.636	15.42
Treatment 4	No. 1	247.924	147.878	124.572	59.4381	33.473	21.2905	15.0863	9.10802	10.1922	13.9356
	No. 2	230.028	105.952	52.9866	25.3275	14.2569	14.0912	10.6779	15.4226	10.0078	9.41673
	No. 3	238.932	134.168	88.258	56.3937	40.0876	37.4837	21.7887	13.4148	17.2485	15.7063
	No. 4	206.943	88.1651	44.4471	28.7421	19.6014	15.897	14.0209	13.2843	11.0795	11.4873
	No. 5	227.949	120.765	74.1429	42.4593	36.2702	25.9387	23.8831	19.1045	16.2785	14.8467
	No. 6	222.83	150.604	115.83	75.6588	59.4054	44.8336	35.6691	22.3509	13.4311	11.4421
	No. 7(no clam)	193.796	159.274	127.575	100.299	81.493	69.045	54.424	38.499	26.312	28.8
	No. 8(no clam)	194.464	170.665	133.36	109.024	79.954	64.775	53.458	33.259	24.502	19.215
		Chlorophyll a concentration µg/L
Experimental group		0h	1h	2h	3h	4h	5h	6h	8h	10h	12h
Treatemnt 1	No. 1	59.235	48.772	45.008	41.905	38.755	36.959	35.366	38.804	32.293	32.767
	No. 2	59.304	48.242	48.086	40.682	34.612	25.58	21.072	17.607	15.837	18.202
	No. 3	61.763	51.012	48.082	44.433	42.385	37.455	31.212	33.121	24.304	25.211
	No. 4	59	30.61	20.5493	11.1959	5.98479	6.08189	5.57585	4.0988	3.90381	3.97407
	No. 5	67.126	36.804	24.491	14.364	8.585	6.024	5.81	5.732	5.145	4.785
	No. 6	58.399	30.449	22.901	20.174	14.397	15.213	12.344	10.707	10.714	9.314
	No. 7(no clam)	60.36	58.21	57.656	54.628	50.659	44.735	40.135	39.495	28.185	24.935
	No. 8(no clam)	59.864	52.73	49.531	43.484	41.761	40.185	39.968	36.83	34.909	30.634
Treatemnt 2	No. 1	126.581	111.605	101.608	88.96	68.717	55.249	44.405	41.409	35.392	31.624
	No. 2	126.083	112.465	98.573	99.637	86.868	79.245	76.831	64.263	56.927	57.007
	No. 3	128.454	101.123	70.973	56.637	36.644	30.816	26.24	23.716	19.143	19.969
	No. 4	127.279	50.13	18.242	9.779	7.574	7.651	11.422	7.431	6.193	5.484
	No. 5	128.296	100.787	78.066	57.532	42.542	33.74	33.908	36.342	40.157	42.073
	No. 6	126.092	97.564	70.329	48.914	36.524	25.239	15.193	7.633	6.208	6.029
	No. 7(no clam)	125.599	122.005	124.002	104.231	95.96	76.898	76.346	63.206	52.294	50.048
	No. 8(no clam)	134.468	101.004	90.57	86.215	84.432	82.29	81.474	78.92	70.251	69.381
Treatemnt 3	No. 1	170.119	132.231	109.811	93.612	53.546	41.165	38.634	30.601	29.982	21.711
	No. 2	175.98	152.913	108.151	123.581	117.14	104.137	84.346	70.643	60.412	56.852
	No. 3	171.454	84.114	72.167	53.695	46.819	35.607	23.26	13.438	7.827	5.299
	No. 4	176.711	83.751	32.797	17.482	20.353	20.946	15.084	6.811	6.076	8.016
	No. 5	162.585	103.07	68.881	31.389	17.256	18.196	14.166	7.421	7.993	6.36
	No. 6	175.784	130.622	60.281	32.627	17.463	13.324	11.43	8.084	8.843	9.34
	No. 7(no clam)	171.241	167.118	160.517	154.713	152.126	153.704	148.22	121.823	119.312	118.398
	No. 8(no clam)	165.186	151.213	132.833	131.919	125.128	122.388	128.046	118.218	112.027	95.085
Treatemnt 4	No. 1	226.825	181.852	176.358	150.355	131.029	118.411	114.818	70.283	49.565	44.676
	No. 2	234.64	190.213	178.229	141.466	126.552	109.507	92.092	90.623	55.48	64.077
	No. 3	228.605	184.562	117.077	78.655	45.404	32.274	20.517	13.726	12.345	13.486
	No. 4	235.615	146.234	74.985	40.044	13.284	9.273	9.41	9.189	7.078	7.572
	No. 5	216.78	146.178	145.039	110.644	77.563	59.304	42.025	37.271	38.078	25.142
	No. 6	234.379	157.876	93.98	72.26	60.496	51.375	43.768	21.211	20.079	18.404
	No. 7(no clam)	228.321	199.239	194.596	190.603	191.002	190.047	180.528	160.634	153.801	149.784
	No. 8(no clam)	220.248	194.608	183.84	185.812	179.371	185.233	185.696	185.261	173.379	169.206
