# Supplementary material for: Toxic dinoflagellate Prorocentrum cordatum affects the filtration rate and enzymatic activities of Chinese razor clam (Sinonovacula constricta)
Source: PeerJ journal article supplement (doi:10.7717/peerj.20072), 2025-09-18
Supplement: raw_data.zip [file Enzymatic activities.xlsx]

## Sheet: Sheet1
		SOD activity (U mg-1 prot)		CAT activity (U mg-1 prot)		TRY activity (U mg-1 prot)		LPS activity (U mg-1 prot)		AMS activity (U mg-1 prot)		CL activity (U mg-1 prot)
		Control group	Exposed group	Control group	Exposed group	Control group	Exposed group	Control group	Exposed group	Control group	Exposed group	Control group	Exposed group
Treatment 1	No. 1	17.4901	19.1948	0.6413	0.9523	476.822	276.274	0.533	0.8332	0.2545	0.2618	11.6315	5.2316
	No. 2	18.2585	19.4491	0.5051	0.9425	542.573	276.411	0.4511	0.5408	0.3246	0.2754	10.6493	7.6365
	No. 3	17.322	17.5923	0.8081	0.6618	324.752	359.782	0.3156	0.9157	0.3156	0.2368	5.7694	8.7804
	No. 4	19.9255	18.9282	0.7791	0.9523	261.213	412.493	0.3915	0.2294	0.2782	0.3417	7.3536	3.7046
	No. 5	14.4414	17.8691	0.596	0.9425	290.767	408.613	0.804	0.4682	0.2034	0.3222	8.8718	5.152
	No. 6	17.7062	17.8564	0.6426	0.6618	373.712	249.003	0.3956	1.0772	0.3012	0.2573	8.4284	9.3246
Treatment 2	No. 1	17.5807	18.4793	0.3633	0.5181	402.64	194.68	0.8452	0.7048	0.2335	0.247	9.9918	9.7005
	No. 2	20.6392	19.065	0.4983	0.4765	439.27	147.606	0.3427	0.4784	0.3607	0.2557	11.1263	7.1089
	No. 3	17.4041	20.3253	0.6736	0.3568	292.536	150.782	0.6671	0.4887	0.2498	0.3015	10.7317	7.4607
	No. 4	19.5448	20.459	0.3082	0.4583	372.883	439.445	0.6091	0.8153	0.2463	0.2679	5.0938	4.6147
	No. 5	18.0702	20.114	0.3603	0.4152	397.575	455.79	0.7683	0.8079	0.2621	0.2873	4.2561	7.8332
	No. 6	18.1674	19.027	0.2487	0.6026	283.33	510.749	0.5951	0.5703	0.2712	0.1936	4.9246	5.5257
Treatment 3	No. 1	16.7394	19.097	0.7459	0.3434	314.622	286.514	0.8268	0.4851	0.2664	0.3145	8.203	5.9284
	No. 2	16.6001	19.479	0.4745	0.7395	209.87	286.093	1.0115	0.4844	0.1825	0.3879	7.6299	7.8643
	No. 3	16.379	20.1204	0.8408	0.7966	170.851	182.383	0.6081	0.5878	0.2875	0.4101	9.1712	6.0059
	No. 4	18.997	19.6555	0.3763	0.5196	162.784	210.667	0.8268	0.9018	0.2919	0.3656	8.335	8.7381
	No. 5	20.5556	19.8324	0.3546	1.0792	213.888	175.359	0.7517	0.4626	0.2727	0.3795	5.701	5.969
	No. 6	19.0844	20.1955	1.2043	0.4786	254.469	231.604	0.8604	0.6082	0.2852	0.344	7.9117	5.4106
Treatment 4	No. 1	13.8663	20.6918	1.0219	0.549	138.889	322.422	0.8921	0.3117	0.2635	0.3096	7.1437	6.6555
	No. 2	15.4975	20.4359	0.6846	0.619	384.247	236.342	0.8299	0.3591	0.2831	0.3927	7.2307	7.772
	No. 3	15.4007	19.6779	0.4705	0.5805	312.735	189.655	0.9484	0.3227	0.208	0.3489	9.748	10.2778
	No. 4	19.3589	20.6555	0.5977	0.5579	453.39	411.025	1.2612	0.8079	0.3276	0.235	8.1486	6.5854
	No. 5	18.7619	19.8324	0.7564	0.5753	295.429	414.218	0.6217	0.5815	0.3262	0.2369	7.8239	7.8368
	No. 6	16.533	20.1955	0.3652	0.2456	317.193	393.712	0.8799	0.7282	0.3511	0.2609	6.05	4.8544
