# Supplementary material for: Toxic dinoflagellate Prorocentrum cordatum affects the filtration rate and enzymatic activities of Chinese razor clam (Sinonovacula constricta)
Source: PeerJ journal article supplement (doi:10.7717/peerj.20072), 2025-09-18
Supplement: raw_data.zip [file Filtration rate.xlsx]

## Sheet: Sheet1
			Filtration rate µg/h
			1h	2h	3h	4h	5h	6h	8h	10h	12h
Treatment 1	Control Group	No. 1	27.43	5.81	10.42	5.37	3.37	1.66	1.73	0.22	0.9
		No. 2	33.97	13.65	4.92	2.46	0.12	0.18	0.68	0.45	0.07
		No. 3	31.75	8.14	3.12	7.32	3.22	1.12	0.45	1.01	0.22
		No. 4	19.51	11.18	1.98	5.58	0.36	0.65	1.01	0.15	1.04
		No. 5	26.63	11.55	4.43	3.35	1.99	0.83	0.58	0.48	0.13
		No. 6	16.18	8.79	3.49	3.96	1.54	0.08	0.65	2.4	1.93
	Exposed Group	No. 1	10.46	3.76	3.1	3.15	1.8	1.59	0.44	6.51	0.47
		No. 2	11.06	0.16	7.4	6.07	9.03	4.51	3.47	1.77	0.37
		No. 3	10.75	2.93	3.65	2.05	4.93	6.24	0.91	8.82	0.91
		No. 4	35.96	12.74	11.85	6.6	0.12	0.64	1.87	0.25	0.09
		No. 5	30.32	12.31	10.13	5.78	2.56	0.21	0.08	0.59	0.36
		No. 6	27.95	7.55	2.73	5.78	0.82	2.87	1.64	0.01	1.4
			Filtration rate µg/h
			1h	2h	3h	4h	5h	6h	8h	10h	12h
Treatment 2	Control Group	No. 1	90.83	13.44	12.14	0.08	8.68	5.47	10.14	3.87	0.42
		No. 2	55.24	23.51	7.84	8.33	6.63	2.92	3.43	1.55	0.59
		No. 3	62.16	17.95	8.71	10.05	0.96	0.75	4.36	1.32	0.14
		No. 4	59.53	14.52	6.8	2.01	1.18	0.19	0.21	0.31	0.48
		No. 5	38.18	20.25	8.41	11.21	5.39	2.48	0.47	3.47	0.79
		No. 6	36.48	22.25	9.13	8.75	3.01	4.84	3.58	1.4	0.66
	Exposed Group	No. 1	15.98	10	12.65	20.24	13.47	10.84	3	6.02	3.77
		No. 2	14.62	13.89	0.06	12.77	7.62	2.41	12.57	7.34	0.08
		No. 3	28.33	30.15	14.34	19.99	5.83	4.58	2.52	4.57	0.83
		No. 4	78.15	31.89	8.46	2.21	0.08	3.77	3.99	1.24	0.71
		No. 5	32.51	22.72	20.53	14.99	8.8	0.17	0.43	0.82	0.92
		No. 6	25.53	27.24	21.42	12.39	11.29	10.05	7.56	1.43	0.18
			Filtration rate µg/h
			1h	2h	3h	4h	5h	6h	8h	10h	12h
Treatment 3	Control Group	No. 1	78.42	20.51	11.36	14.17	9.23	7.58	2.98	6.05	0.42
		No. 2	74.81	16.89	19.98	11.57	10.23	5.29	8.04	3.1	0.2
		No. 3	81.84	28.44	11.46	8.19	3.73	5.18	5.9	3.31	0.68
		No. 4	37.62	26.72	18.31	13.78	10.95	8.85	14.02	11.22	4.33
		No. 5	56.8	26.85	24.59	11.21	8.8	6.18	10.04	6.61	2.19
		No. 6	70.15	29.44	15.14	4.15	4.83	0.83	0.17	1.85	2.76
	Exposed Group	No. 1	37.89	22.42	16.2	40.07	12.38	2.53	8.03	0.62	8.27
		No. 2	23.07	44.76	15.43	6.44	13	19.79	13.7	10.23	3.56
		No. 3	87.34	11.95	18.47	6.88	11.21	12.35	9.82	5.61	2.53
		No. 4	92.96	50.95	15.32	2.87	0.59	5.86	8.27	0.74	0.94
		No. 5	59.52	34.19	37.49	14.13	0.94	4.03	6.75	0.57	1.63
		No. 6	45.16	70.34	27.65	15.16	4.14	1.89	3.35	0.76	0.5
			Filtration rate µg/h
			1h	2h	3h	4h	5h	6h	8h	10h	12h
Treatment 4	Control Group	No. 1	79.73	18.57	51.9	20.69	9.71	4.94	4.76	0.86	0.98
		No. 2	98.87	42.21	22.04	8.82	0.13	2.72	0.78	4.32	0.47
		No. 3	83.48	36.59	25.39	12.99	2.08	12.51	6.67	0.06	1.23
		No. 4	94.65	34.84	12.52	7.28	2.95	1.5	0.59	1.76	0.33
		No. 5	85.41	37.15	25.25	4.93	8.23	1.64	3.81	2.25	1.14
		No. 6	57.56	27.71	32.01	12.95	11.61	7.3	10.61	7.11	1.59
	Exposed Group	No. 1	44.97	5.49	26	19.33	12.62	3.59	44.54	20.72	4.89
		No. 2	44.43	11.98	36.76	14.91	17.05	17.42	1.47	35.14	0.6
		No. 3	44.04	67.49	38.42	33.25	13.13	11.76	6.79	1.38	0.14
		No. 4	89.38	71.25	34.94	26.76	4.01	0.14	0.22	2.11	0.49
		No. 5	70.6	1.14	34.4	33.08	18.26	17.28	4.75	0.81	12.94
		No. 6	76.5	63.9	21.72	11.76	9.12	7.61	22.56	1.13	1.68
